# Supplementary material for: Fabrication of an imprinted polymer based graphene oxide composite for label-free electrochemical sensing of Sus DNA
Source: Royal Society of Chemistry journal article supplement (doi:10.1039/d2nj02958h), 2022-01-01
Supplement: d2nj02958h1.pdf [file d2nj02958h1.pdf]

**Fabrication of imprinted polymer based graphene oxide composite for label-free  
electrochemical sensing of *Sus* DNA**

**Zaib un Nisa Mughal<sup>1</sup>, Huma Shaikh<sup>1,\*</sup>, Jamil Ahmed Baig<sup>1</sup>, Shahabuddin Memon<sup>1</sup>,  
Sirajuddin<sup>2</sup>, Shahnila Shah<sup>1</sup>**

<sup>1</sup>National Center of Excellence in Analytical Chemistry, University of Sindh, Jamshoro -  
76080, Sindh, Pakistan.

<sup>2</sup>H. E. J. Research Institute of Chemistry, I.C.C.B.S. University of Karachi, Karachi -75270,  
Sindh, Pakistan.

**Corresponding Author:**

Huma Shaikh

Email: [huma.hashu@gmail.com](mailto:huma.hashu@gmail.com)

ORCID: 0000-0003-1838-3452

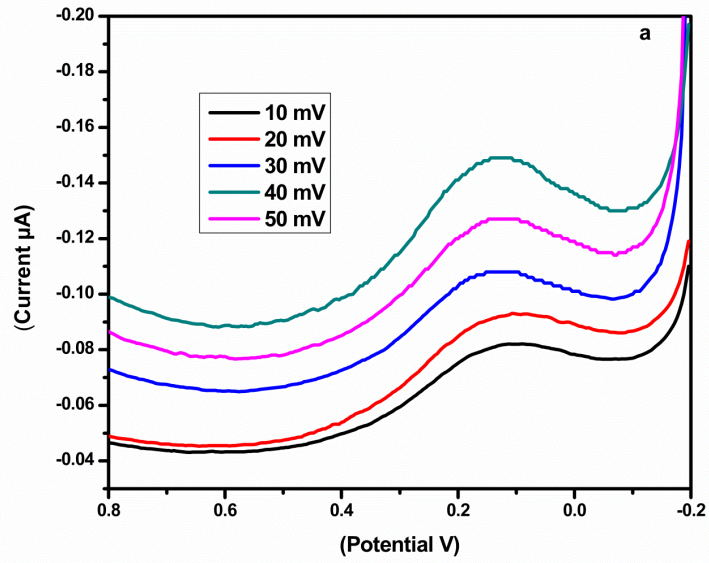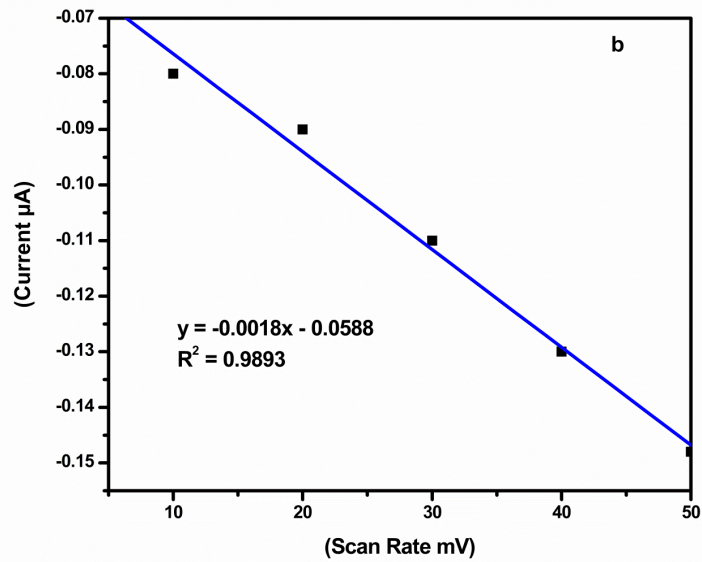

Fig S1: Effect of scan rate on MIP/mGO GCE for detection of *Sus* DNA (a) varied scan from 10 mV to 50 mV (b) regression plot of scan rate.

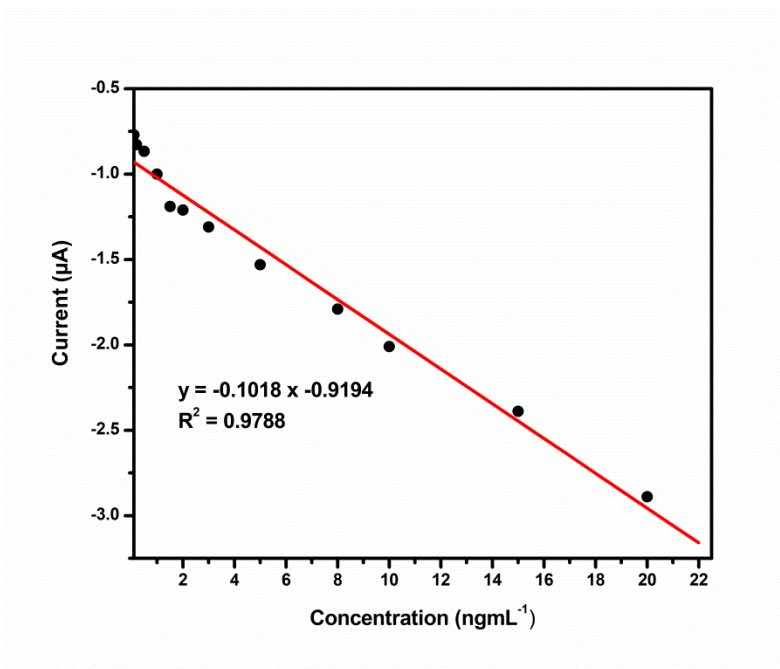

Fig 2S: Plot of linear regression equation obtained using MIP/mGO GCE in BRB of pH 2

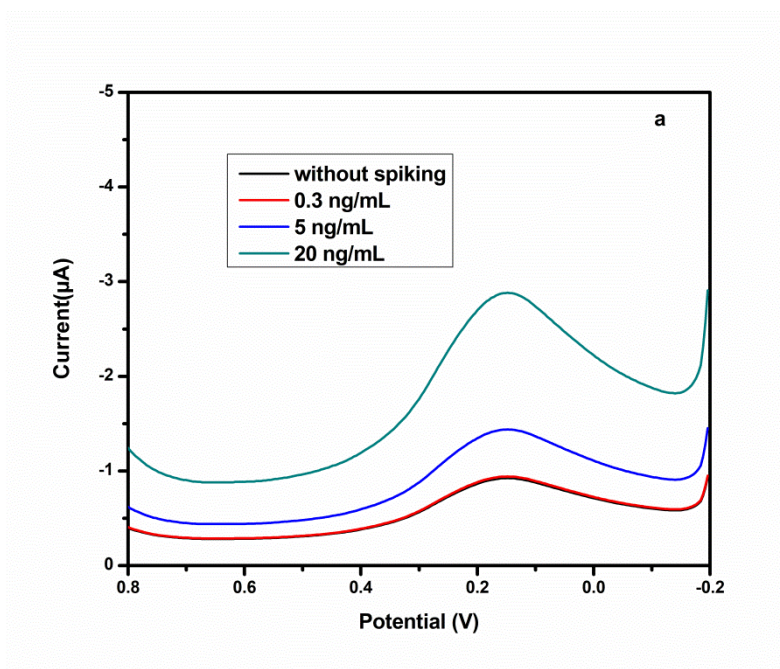

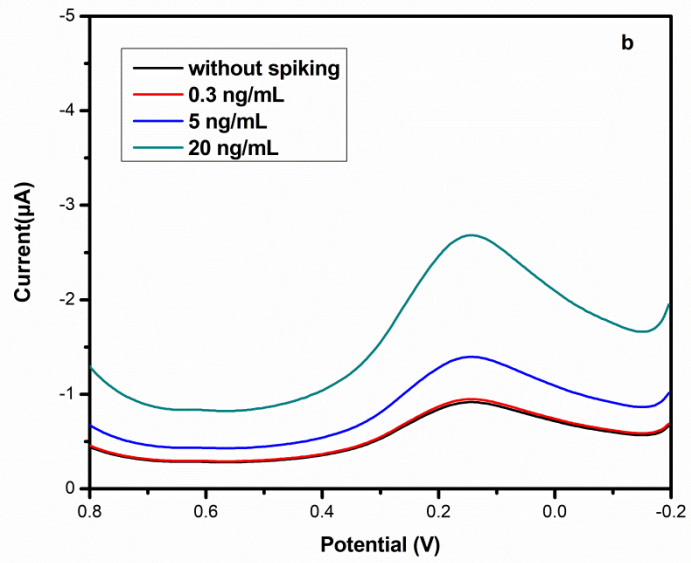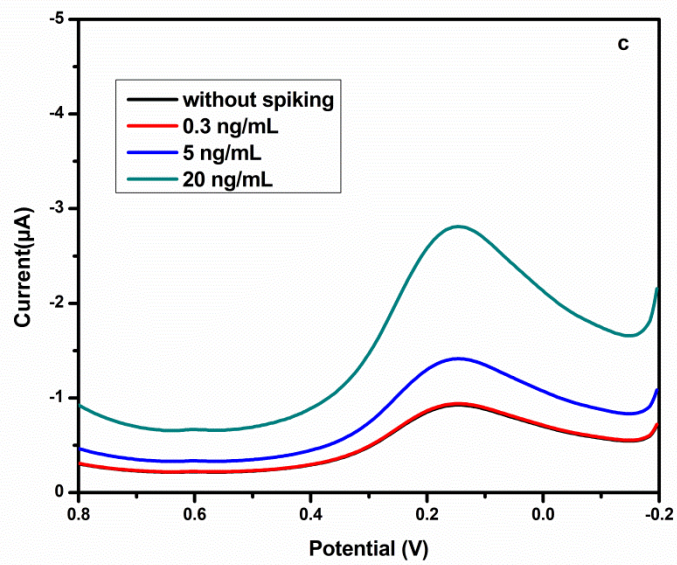

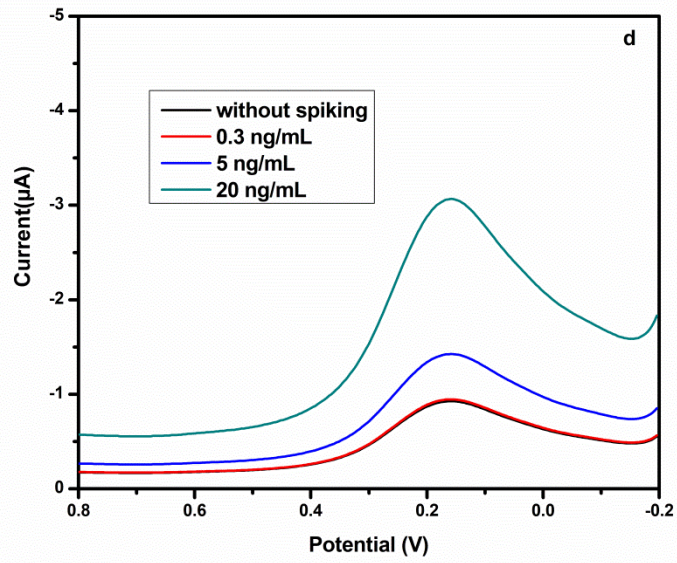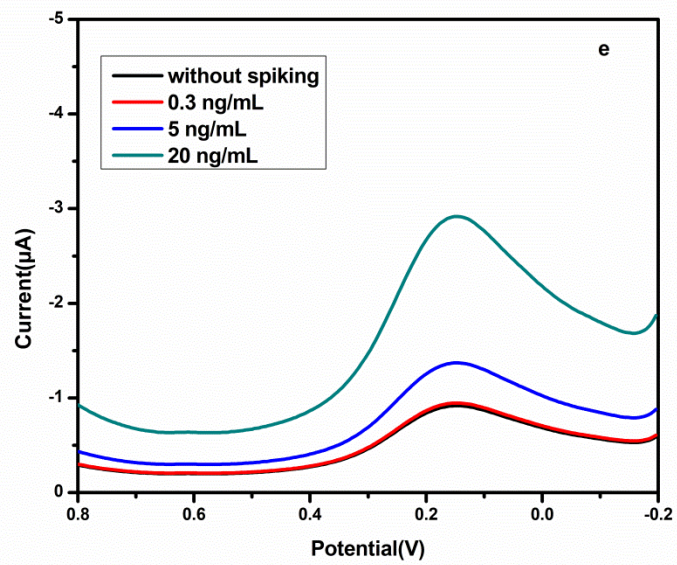

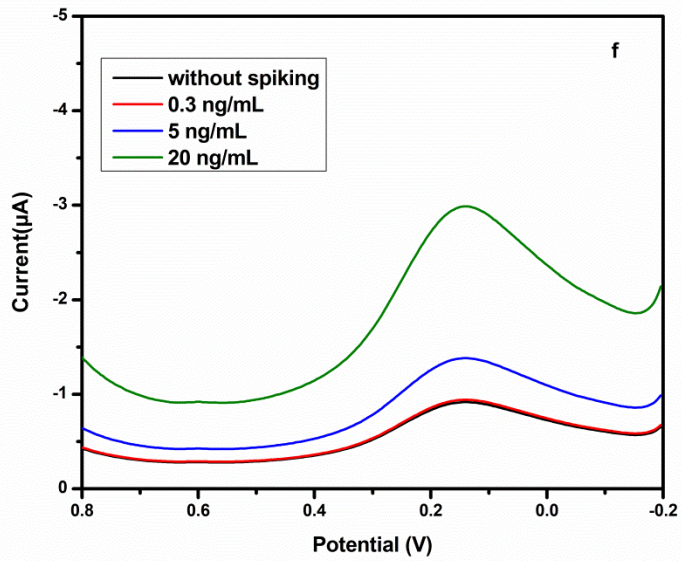

Fig 3 S: DPV electrograms of real samples (a) Marshmallow (b) Jelly (c) E110 (d) E442, E476 (e) Soft shell capsule 1 (f) Soft shell capsule 2
